# Supplementary material for: Phenolic Constituents with Antioxidant and &alpha;-glucosidase Inhibitory Activities from Sugar Maple (<em>Acer saccharum</em> Marsh.) Fall Leaves
Source: Preprints.org preprint supplement (doi:10.20944/preprints201911.0354.v1), 2019-11-28

**Figure S1: An HPLC-DAD profile of the ethyl acetate extract of sugar maple leaves and the isolates compounds**

HPLC Conditions

| Time (min) | A (0.1%TFA in Water) | B(Methanol) | Flow rate (mL/min) |
|------------|----------------------|-------------|--------------------|
| 0          | 85                   | 15          | 0.75               |
| 12         | 60                   | 40          | 0.75               |
| 30         | 55                   | 45          | 0.75               |
| 45         | 50                   | 50          | 0.75               |
| 55         | 44                   | 56          | 0.75               |
| 56         | 85                   | 15          | 0.75               |
| 65         | 85                   | 15          | 0.75               |

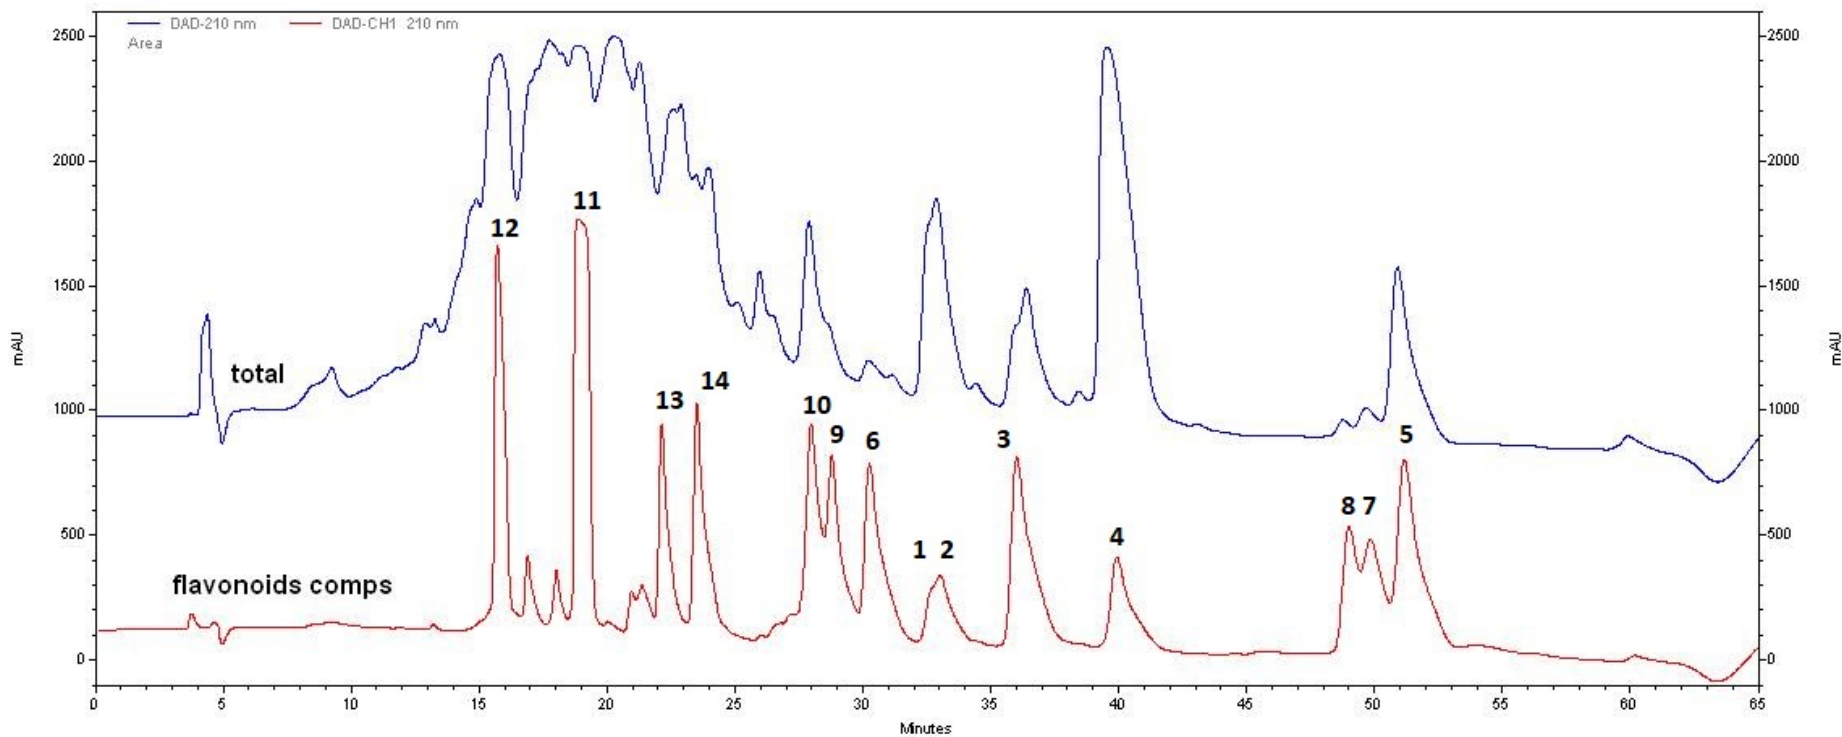

**Flavonoids Profile (1-14)**

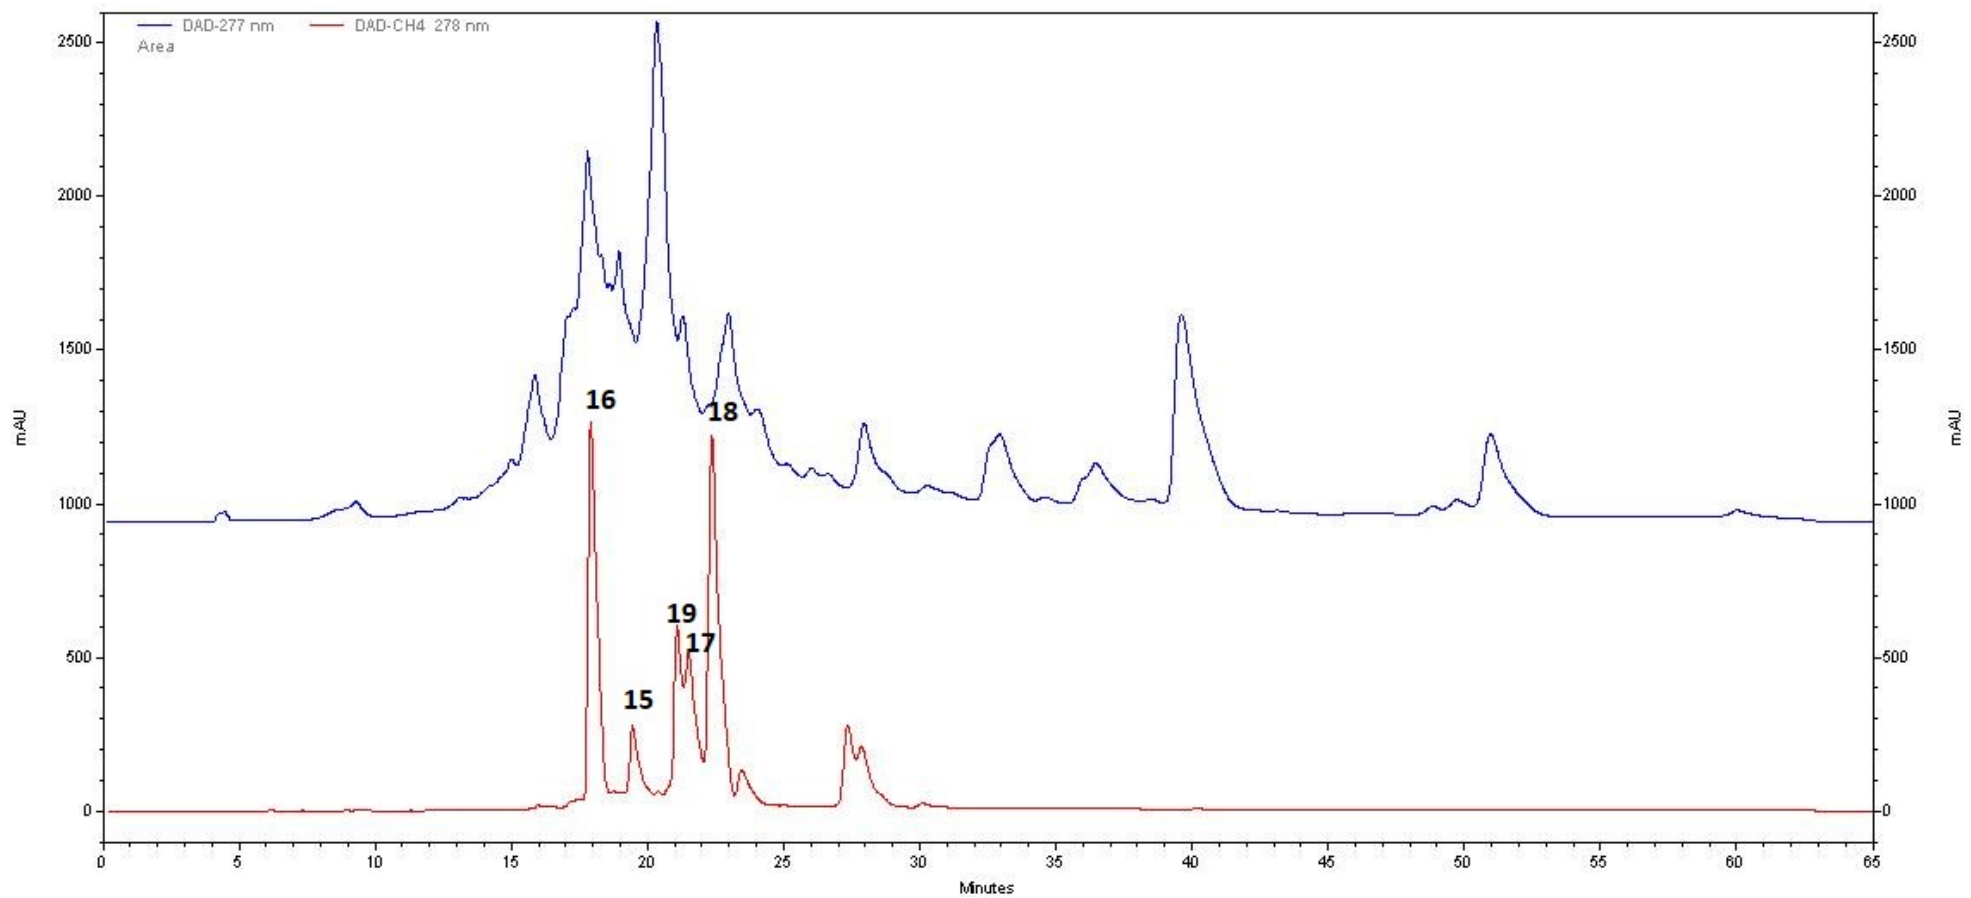

Quinic acid derivatives profile (15-19)

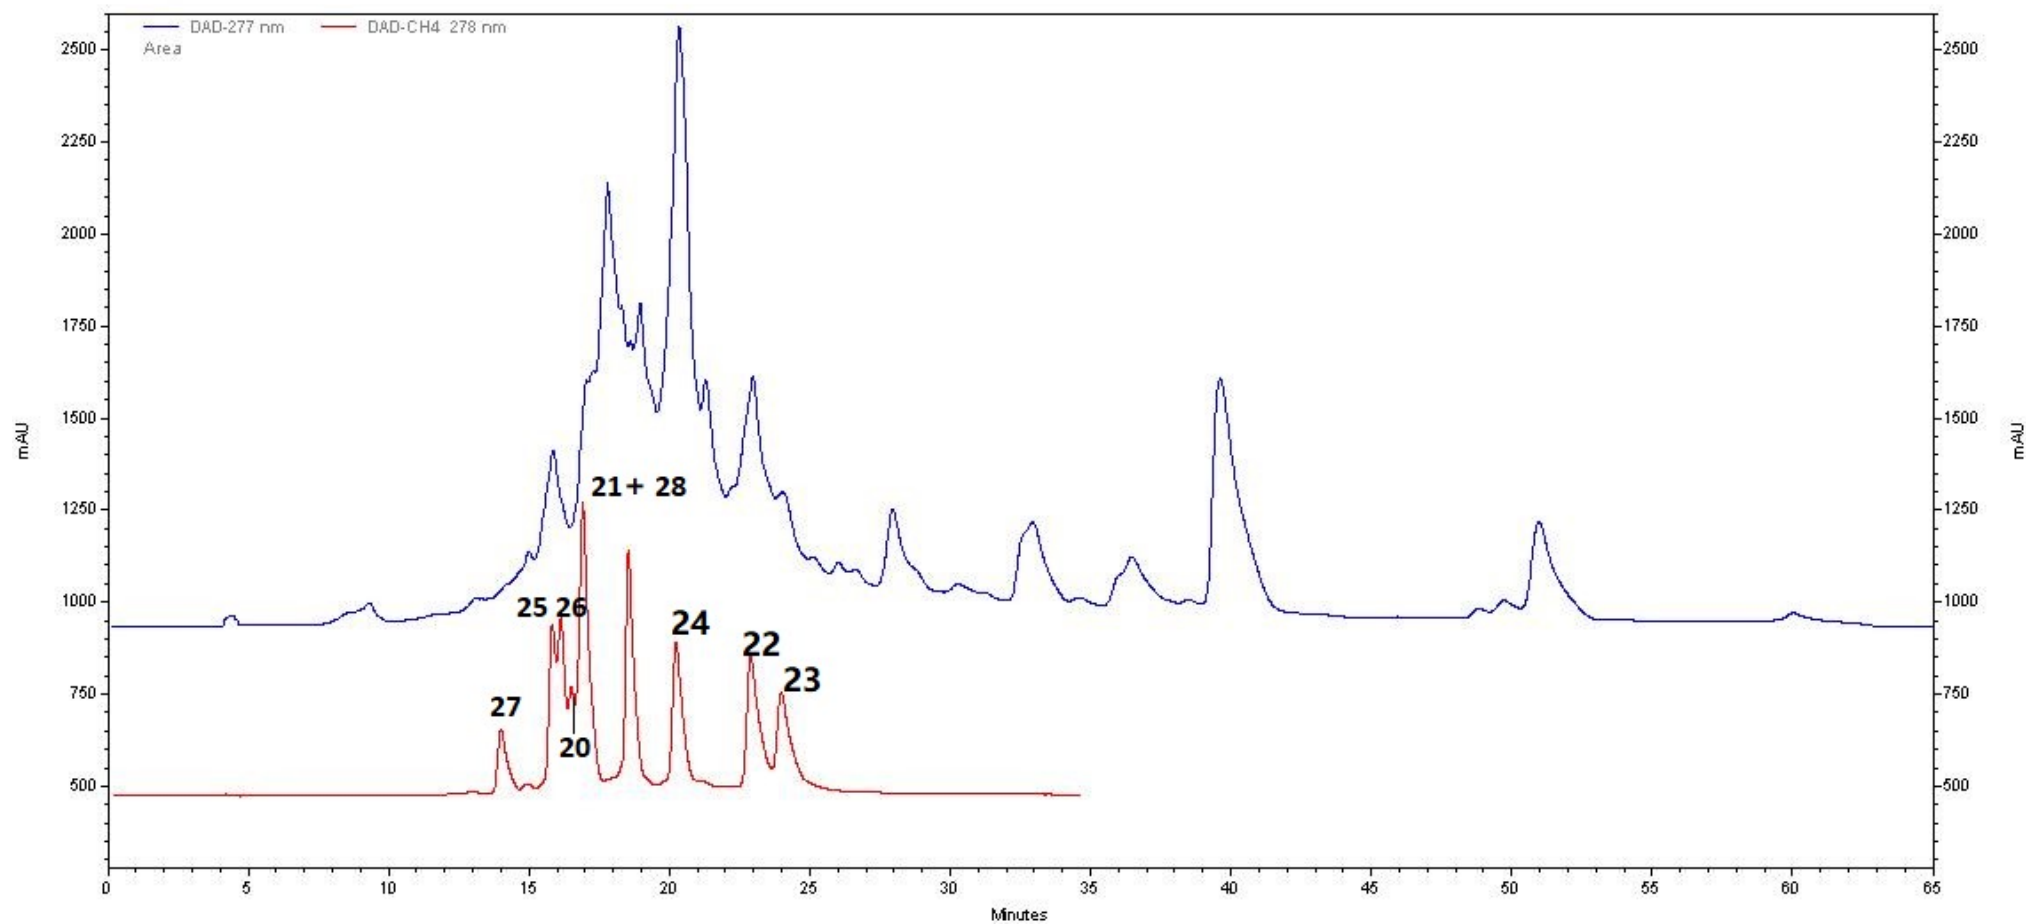

Galloyl tannins and other phenolic acids profile (20-28)

**Figure S2: Extraction and isolation flow chart of compounds 1–28 from sugar maple leaves.**

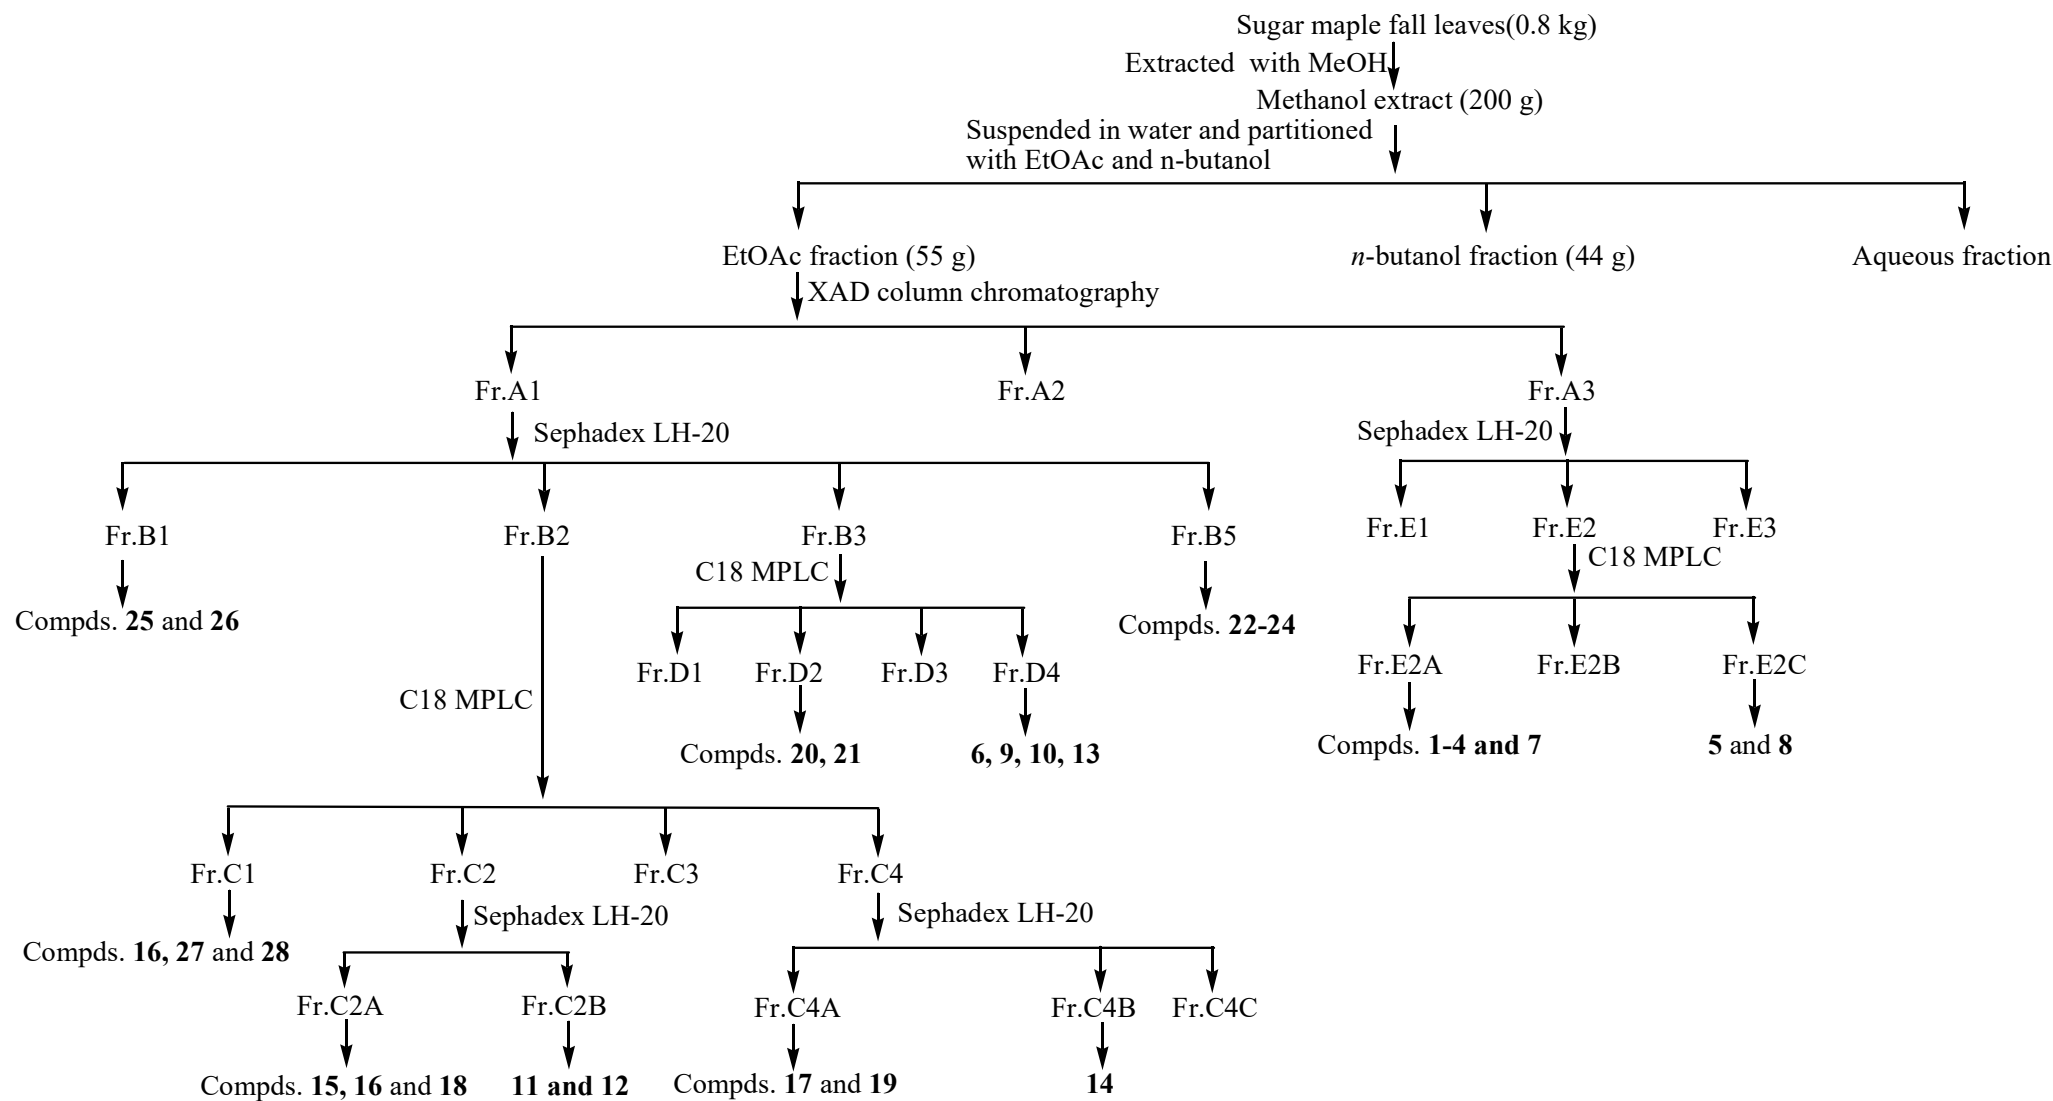

Supplement: Supplementary file 1 [file supplementary]
